1 **Coloring inside the lines: genomic architecture and evolution of a widespread color pattern in**  
2 **frogs**

3 **Authors**

4 Sandra Goutte<sup>a\*</sup>, Imtiyaz Hariyani<sup>a</sup>, Kole Deroy Utzinger<sup>a</sup>, Yann Bourgeois<sup>b</sup> & Stéphane  
5 Boissinot<sup>a\*</sup>

6 **Affiliations**

7 <sup>a</sup> New York University Abu Dhabi, Saadiyat Island, Abu Dhabi, UAE

8 <sup>b</sup> School of Biological Sciences, University of Portsmouth, Portsmouth, United Kingdom

9

10 **\*Corresponding authors email addresses:** [sb5272@nyu.edu](mailto:sb5272@nyu.edu) (SB), [sg5533@nyu.edu](mailto:sg5533@nyu.edu) (SG)

11

12

## 13 **Summary**

14            Traits shared among distantly related lineages are indicators of common  
15 evolutionary constraints, at the ecological, physiological or molecular level. The vertebral  
16 stripe is a color pattern that is widespread across the anuran phylogeny. Despite its  
17 prevalence in the order, surprisingly little is known about the genetic basis and  
18 evolutionary dynamic of this color pattern. Here we combine histology, genome- and  
19 transcriptome-wide analyses with order-scale phylogenetic comparative analyses to  
20 investigate this common phenotype. We show that the vertebral stripe has evolved  
21 hundreds of times in the evolutionary history of anurans and is selected for in terrestrial  
22 habitats. Using the Ethiopian *Ptychadena* radiation as a model system, we demonstrate that  
23 variation at the *ASIP* gene is responsible for the different vertebral stripe phenotypes.  
24 Alleles associated to these phenotypes are younger than the split between closely related  
25 *Ptychadena* species, thus indicating that the vertebral stripe results from parallel evolution  
26 within the group. Our findings demonstrate that this widespread color pattern evolves  
27 rapidly and recurrently in terrestrial anurans, and therefore constitute an ideal system to  
28 study repeated evolution.

29

## 30 **Keywords**

31 Repeated evolution, adaptation, Agouti signaling protein, color polymorphism, Anura

32

## 33 **Introduction**

34            Animal color patterns are conspicuous hallmarks of selection. Color patterns may  
35 evolve because they are linked to a beneficial physiological trait<sup>1,2</sup> or because they serve as

36 sexual<sup>3,4</sup> or warning signals<sup>5</sup>. Alternatively, color pattern can help avoid detection from  
37 visually-oriented predators or prey by disrupting body shape recognition<sup>6-9</sup>, masquerading  
38 as an object or animal<sup>10</sup>, countershading<sup>11</sup>, or substrate-matching<sup>12-14</sup>. In many species,  
39 multiple color patterns coexist within or between populations. These polymorphisms can  
40 be maintained by divergent mating strategies<sup>15,16</sup>, apostatic selection (preference for the  
41 most common morph by predators), temporal or spatial habitat heterogeneity<sup>5</sup>, or  
42 heterozygote advantage on correlated traits<sup>2</sup>. This diversity of selective regimes makes  
43 color patterns an ideal system to investigate the evolutionary mechanisms underlying  
44 phenotypic evolution.

45  
46 The vertebral stripe is a common color pattern found across numerous distantly  
47 related anuran amphibians around the world (Fig. 1a). Phenotypes shared across highly  
48 divergent lineages can result from ancestral alleles conserved over millions of years of  
49 evolution, or have evolved independently multiple times, perhaps driven by similar  
50 selective forces. While predator-mediated selection is a widely assumed mechanism for the  
51 evolution and maintenance of most color patterns in anurans<sup>17</sup>, the link between the  
52 anuran vertebral stripe and survival is only empirically supported in a few species<sup>13,18,19</sup>  
53 (but see<sup>20</sup>). In order to understand the evolutionary history of the vertebral stripe in  
54 anurans, a broad-scale comparative analysis is necessary. Understanding the genomic  
55 architecture underlying phenotypes can also inform on the evolutionary mechanisms at  
56 play. Despite the commonness of the pattern, the genetic basis of the anuran vertebral  
57 stripe is largely unknown. In the few species investigated, the stripe is determined by a

58 dominant allele at a single locus<sup>17,21</sup>. However, as these inferences were made solely on  
59 crossings, the identity of the locus or loci involved remains to be determined.

60

61 Here we combine macro- and microevolutionary analyses with transcriptomic and  
62 histological data to investigate the evolutionary history and genomic architecture  
63 underlying the vertebral stripe in anurans. By integrating results at three different scales  
64 (order, species group, and species), our study exemplifies how natural selection combined  
65 with rapidly evolving genomic regions may result in recurrent phenotypic evolution.

66

## 67 **Results**

### 68 *Evolutionary history of the vertebral stripe in anurans*

69 To retrace the evolutionary history of the vertebral stripe in anurans, we examined  
70 the dorsal color pattern of 2,785 anuran species for which phylogenetic data was  
71 available<sup>22</sup>, representing 37.6% of species and 96.5% of families currently recognized in  
72 Anura<sup>23</sup>. A vertebral stripe morph was present in 15.7% of the 2,785 species included, and  
73 of those, 78% were polymorphic for the trait (Fig. 1b). Our analysis estimated that the  
74 vertebral stripe pattern evolved independently  $330 \pm 18$  times across the phylogeny and  
75 was lost  $515 \pm 42$  times (Fig. 1c). This result strongly supports the hypothesis of multiple  
76 origins of the anuran dorsal stripe and rejects the hypothesis of ancestral alleles conserved  
77 across anurans' evolutionary history.

78

79 Once we established that the vertebral stripe evolved independently multiple times,  
80 we investigated the role of the environment in the evolution of this trait. We hypothesized

81 that recurrent evolution of the vertebral stripe across anurans may be due to similar  
82 selective pressures in shared habitat types. To test this hypothesis, we carried a  
83 comparative analysis on 2,620 anuran species, and compared habitat-dependent and  
84 habitat-independent models of evolution for the vertebral stripe. Our analysis revealed that  
85 the rate of transition between unstriped and striped morphs is correlated with habitat  
86 (Supp. Fig. S1). The vertebral stripe evolved significantly more often in terrestrial clades  
87 compared to terrestrial-aquatic, arboreal, and terrestrial-arboreal lineages (Fig 1d and 1e;  
88 Table 1). Arboreal lineages also showed the lowest gain and highest loss rates for the color  
89 pattern. The vertebral stripe may thus be selected against in arboreal habitats and selected  
90 for in terrestrial habitats.

91

### 92 *Cellular organization of the vertebral stripe*

93 To investigate the molecular and cellular mechanisms underlying the vertebral  
94 stripe in anurans, we focused on a radiation of terrestrial frogs, the *Ptychoadena neumanni*  
95 species complex. This monophyletic group encompasses 12 species<sup>24</sup>, which all present  
96 vertebral stripe polymorphism (the stripe could be thin, wide, or absent), except for two  
97 species: *P. harensis*, in which the vertebral stripe morph is always absent and *P. cooperi*, for  
98 which all individuals present a thin vertebral stripe (Fig. 2a and 2b). We examined the  
99 pigment cells organization in the dorsal skin of ten individuals of the *P. neumanni* species  
100 complex (*P. robeensis*, *P. nana*, *P. erlangeri* and *P. amharensis*) presenting different  
101 vertebral stripe phenotypes (thin or wide striped, or unstriped; Fig. 2b). Outside the stripe,  
102 numerous melanophores with dispersed melanosomes covering other chromatophores,  
103 and melanosomes in the epidermal layer create a dark coloration (Fig. 2c). Within the

104 stripe, melanophores with aggregated melanosomes (when present) and no or few  
105 epidermal melanosomes result in a lighter shade (Fig. 2c). The number and state  
106 (aggregated vs. dispersed) of the melanophores, as well as the concentration of epidermal  
107 melanosomes thus seem to be the major determinants of the vertebral stripe pattern in the  
108 species examined.

109

### 110 *Genomic architecture of the vertebral stripe in Ptychadena robeensis*

111 To identify the genomic region(s) involved in the dorsal stripe pattern, we  
112 conducted a genome-wide association study (GWAS) on one species of the *P. neumanni*  
113 complex, *Ptychadena robeensis*, which is polymorphic for the trait. We produced whole-  
114 genome resequencing data (4.84X average coverage) for 52 individuals with either a wide  
115 (n = 25) or a thin (n = 27) vertebral stripe and aligned the reads on the recently assembled  
116 chromosome-level genome of the species<sup>25</sup>, resulting in a total of a 17,797,568 single-  
117 nucleotide polymorphisms (SNPs) dataset. The number of unstriped individuals collected  
118 being low (n=5), we excluded this phenotype from the analysis. We identified a single  
119 genomic region associated with the color pattern, which included multiple significant SNPs  
120 (Fig. 3a).

121

122 The identified SNPs are located on chromosome 11 downstream of a region  
123 containing two predicted<sup>25</sup> copies of the *Agouti signaling protein* gene (*ASIPa* and *ASIPb*;  
124 see Methods and Supp. Fig. S3). The majority of the SNPs are in the region overlapping with  
125 *ASIPb* and a non-coding RNA (ncRNA) sequence (Fig. 3a) located downstream of this gene,  
126 and all of them fall outside coding sequences. *ASIP* is known to be involved in melanophore

127 differentiation and melanin production in vertebrates<sup>26,27</sup>. By examining the phenotypes of  
128 homozygote and heterozygote individuals, we determined that the *wide* allele is dominant  
129 over the *thin* allele. Because all of these SNPs are located outside the predicted protein  
130 coding regions, we hypothesize that they affect the expression of the gene. An up-  
131 regulation of *ASIP* is linked to lighter phenotypes in mammals<sup>28,29</sup> and fishes<sup>27</sup>, we could  
132 thus expect an up-regulation of *ASIP* in individuals with a wide vertebral stripe.

133

#### 134 *Differential gene expression associated with the vertebral stripe*

135 We explored transcriptome-wide patterns of gene expression in the skin of adult *P.*  
136 *robeensis* presenting a thin, wide, or no vertebral stripe (Fig. 3b and 3c). Surprisingly, the  
137 expression levels of *ASIPa*, *ASIPb* and the ncRNA were very low in dorsal skin, and no  
138 significant differential expression could be detected between phenotypes or between skin  
139 samples collected within versus outside the stripe (Supp. Fig. S4). The transcripts were at  
140 considerably greater concentration in the ventral skin, which is white and lacks any  
141 melanization (Supp. Fig. S4a). To quantify more precisely *ASIP* expression in the dorsal  
142 skin, we conducted a quantitative real-time PCR experiment (qPCR), which confirmed  
143 comparable expression levels of *ASIPb* within and outside the vertebral stripe (Supp. Fig.  
144 S5).

145

146 Thirty two transcripts were found at significantly different abundance between the  
147 *thin* and *wide* morphs (Fig. 3b; Supp. Table S2), ten of which were associated with *per3*, a  
148 gene involved in the circadian rhythm of vertebrates<sup>30,31</sup>. Six transcripts were at lower  
149 concentration within the stripe compared to dorsal skin outside the stripe, and none

150 showed a higher abundance (Fig. 3c). Three of these were transcripts of *aldoa*, a gene  
151 expressed during melanogenesis in mammals<sup>32</sup> and up-regulated in yellow compared to  
152 black carp<sup>33</sup>.

153

#### 154 *Recent evolution of the thin and wide alleles*

155 To estimate the age of the *wide* and *thin* alleles and look for signatures of selection,  
156 we used Ancestral Recombination Graphs (ARG) analyses on four individuals of *P. robeensis*  
157 representative of the different phenotypes which were sequenced at a higher coverage  
158 (12.97X on average). Times to the Most Recent Common Ancestor (TMRCA) for the *thin* and  
159 *wide* alleles were more recent than the surrounding genomic regions or the total  
160 population TMRCA in region directly surrounding the most significant SNPs outputted by  
161 the GWAS (Fig. 4a). This result is consistent with a partial selective sweep and excludes the  
162 possibility of an ancient polymorphism maintained by balancing selection. Both the *wide*  
163 and *thin* alleles have evolved recently, 100,000-300,000 years ago. These alleles thus arose  
164 long after the divergence between *Ptychadena robeensis* and its closest relatives, estimated  
165 at 3.8-8.3 million years ago<sup>34</sup>.

166

167 When comparing the genomic region of interest between all 12 species of the *P.*  
168 *neumanni* complex (8.29X average coverage), we found that the *thin* and *wide* alleles were  
169 indeed private to *Ptychadena robeensis* and not shared with the other *Ptychadena* species  
170 (Fig. 4.b). This result is further supported by a phylogeny of the region of interest where  
171 haplotypes are grouped according to clades within the radiation, and not phenotypes (Fig.  
172 4.b). Additional GWAS analyses on two other members of the *P. neumanni* complex, *P.*



173 *amharensis* (n = 32; 1.95X average coverage; 82,580,376 SNPs) and *P. beka* (n = 42; 4.58X  
174 average coverage; 33,430,567 SNPs), failed to detect a single locus responsible for the  
175 dorsal pattern for either species. These results indicate that the alleles found in *P. robeensis*  
176 have evolved recently and other alleles are responsible for similar dorsal patterns in  
177 closely related species.

178

## 179 **Discussion**

180 In this study, we show that the anuran vertebral stripe evolved multiple times, and  
181 significantly more often in terrestrial lineages compared to terrestrial-aquatic, arboreal,  
182 and terrestrial-arboreal lineages. The vertebral stripe might increase concealment from  
183 visually oriented predators, such as birds or mammals, which are more prevalent in  
184 terrestrial habitats, and thus confer a fitness advantage. The widespread polymorphism for  
185 the trait may be maintained because some predators attack preferentially the most  
186 common morph and/or because the cryptic advantage of the dorsal pattern changes across  
187 the environment or through seasons. The vertebral stripe polymorphism could also be the  
188 result of recently evolved alleles on their way to fixation. This process could be particularly  
189 slow if alleles causing the vertebral stripe are dominant<sup>17,21</sup> and the stripe adaptive  
190 advantage is only moderate. Interestingly, the vertebral stripe was lost significantly more  
191 often in arboreal lineages than in other groups, indicating a potential fitness cost of the  
192 pattern in this habitat. Other color patterns could also be selected for in arboreal habitats  
193 and the vertebral stripe could be lost as a side-effect. Although the molecular and  
194 evolutionary mechanisms may vary across lineages, a shared selective pressure favored the  
195 presence of striped morphs in terrestrial anurans.

196

197           In the grass frog *Ptychadena robeensis*, we identified two *ASIP* alleles responsible for  
198 distinct vertebral stripe morphs. In doing so, we establish the first evidence of a causal link  
199 between *ASIP* and a color pattern in amphibians. The involvement of *ASIP* in melanophore  
200 differentiation and melanin production has been extensively studied in mammals<sup>28,35-37</sup>,  
201 and in rodents in particular<sup>38-40</sup>. Vertebral stripe pattern differentiation is likely governed  
202 by differential expression of *ASIP* as alleles differ in non-protein coding regions. However,  
203 the expression level of *ASIP* is extremely low and does not differ between morphs in adult  
204 dorsal skin. Morph-dependent differential expression of *ASIP* may thus occur at an earlier  
205 stage of the animal's development<sup>41</sup>, or punctually during chromatophore differentiation  
206 resulting in an overall low level of expression in the dorsal skin. In the *Ptychadena*  
207 *neumanni* species complex, the vertebral stripe first appears at the final stages or after  
208 metamorphosis (personal observation based on 92 individuals identified through  
209 barcoding at different developmental stages). Investigating *ASIP*'s expression levels in the  
210 dorsal skin of metamorphic and juvenile individuals will be necessary to determine the  
211 gene's role in the establishment of the color pattern during development.

212

213           Other genes were found to be differentially expressed (DE genes) between morphs  
214 and between skin sections (within and outside the vertebral stripe). While morph-  
215 dependent DE genes are likely to be involved in the same pathways as *ASIP*, the genes  
216 differentially expressed between sections of the dorsal skin could be produced by the  
217 different mature chromatophores. As opposed to the dorsal skin, *ASIP* expression levels  
218 were high in the ventral skin, which is, as in many other anurans, uniformly white. This

219 dorso-ventral differential expression is comparable to expression patterns found in several  
220 species of fish which also present a white ventrum<sup>27,41</sup>. Interestingly, the difference in  
221 expression level between dorsal and ventral skin was most marked for the ncRNA located  
222 downstream of *ASIPb* (Supp. Fig. S4). Together with the proximity of significant SNPs  
223 outputted by the GWAS (Fig. 3), this indicates that this ncRNA is a major actor in color  
224 pattern determination in this species, likely by having a regulatory role on *ASIPa* and/or  
225 *ASIPb*. *ASIP* thus seems to play a determining role in both the dorsal color pattern and the  
226 lack of melanization in ventral skin.

227

228         In multiple organisms, *ASIP* alleles have evolved rapidly leading to parallel evolution  
229 of similar phenotypes within species<sup>42</sup> or groups of closely-related species<sup>28</sup>. In the *P.*  
230 *neumanni* species complex, species presenting the same color patterns did not share the  
231 *ASIP* alleles with *P. robeensis*. The lack of signal in the GWAS conducted for *P. amharensis*  
232 and *P. beka* could also be indicative of multiple haplotypes leading to the same phenotypes  
233 within these species, which occupies much larger distribution ranges than *P. robeensis* and  
234 presents greater intraspecific genetic variances. We estimated *P. robeensis'* *ASIP* alleles to  
235 have evolved less than 300,000 years ago, much after diverging from its closest known  
236 relatives. *Ptychadena robeensis* occupies grasslands and cultivated fields where  
237 opportunities for hiding from predator under the vegetation are rare and substrate varies  
238 from grass to bare soil. A vertebral stripe (wide or thin) may thus provide a significant  
239 fitness advantage by enhancing crypsis or disrupting body shape recognition.

240

241           Recurrent evolution in the regulatory region of *ASIP* could have led to the same  
242 color patterns in this group of closely-related species, similarly to the horizontal stripes in  
243 African cichlids caused by repeated evolution at *agrp2* regulatory region<sup>43</sup>. However,  
244 mutations impacting the expression of genes interacting with *ASIP* (such as *MC1R* for  
245 example<sup>27</sup>) may also be responsible for the vertebral stripe in *Ptychadena* spp. and other  
246 terrestrial anurans. By demonstrating the involvement of *ASIP* in a widespread trait, our  
247 study opens new research avenues on color patterns in anurans. Mutations in the  
248 regulatory regions of *ASIP* or interacting genes causing the appearance or loss of the  
249 vertebral stripe are likely occurring at a high rate in anurans, making this trait an ideal  
250 system to study parallel evolution.

251

## 252 **Methods**

### 253 *Comparative analysis of vertebral stripe evolution in anurans*

254           We conducted a comparative analysis across the Anura using the largest dated  
255 molecular phylogeny of amphibians published to date<sup>22</sup>. This phylogeny comprises 3,309  
256 species (=45% of currently recognized species<sup>23</sup>), representing most families, subfamilies  
257 and genera<sup>22</sup>. We collected data on dorsal color pattern for 2,785 of these species by  
258 examining all photographs available for each species on *Amphibiaweb*  
259 (<https://amphibiaweb.org>). When no or few photos were available, we searched additional  
260 sources such as original species descriptions and the number of photographs examined for  
261 each species was systematically recorded (Supp. Table S1). Dorsal color patterns were  
262 classified in the following categories: thin, medium or wide stripe, and unstriped. If a

263 species had at least one individual counted in the *unstriped* and one of the *striped*  
264 categories, the species was considered polymorphic for the trait.

265

266 Habitat use data was collected independently for 2,620 species based on multiple  
267 large studies (Supp. Table S1). Anuran habitats were categorized as arboreal, aquatic,  
268 terrestrial, arboreal/terrestrial and terrestrial/aquatic, based on the main habitat occupied  
269 by adult individuals (when reproductive and general habitats were available).

270

271 *Ancestral state reconstruction of dorsal color patterns*

272 To reconstruct the evolutionary history of the vertebral stripe, we created 1,000  
273 stochastic maps of the trait onto the phylogeny using the function *make.simmap* in the R  
274 package *phytools*<sup>44</sup>. Because most of the *striped* species were polymorphic for the trait  
275 (78%), and as erroneous categorization was more likely for the fixed than for the  
276 polymorphic categories (if only few photos were available), we recategorized species as  
277 either having at least some individuals presenting a vertebral stripe, or without any striped  
278 individuals. We thus used two categories, *striped* (including polymorphic species) and  
279 *unstriped* with a model allowing transition rates between the two morphs to be different  
280 (ARD), and estimated the number of transitions during the evolutionary history of anurans.

281

282 *Dorsal pattern evolution in different habitats*

283 To test the hypothesis that the dorsal stripe might be selected for in particular  
284 habitats, we first built 100 stochastic maps of habitat data for the 2,620 species categorized  
285 on the phylogeny. For each of the stochastic trees, we fitted a model for which transition

286 rates between dorsal color patterns was independent of habitat and a model for which  
287 transition rates differed for each habitat using the *fitmultiMk* function from the R package  
288 *phytools*, and compared them using a likelihood ratio test (Supp. Figure S1). As the habitat-  
289 dependent model of evolution for the vertebral stripe was systematically better fitted than  
290 the independent model, we extracted the estimated transition rates between *striped* and  
291 *unstriped* phenotypes for each habitat and each of the 100 stochastic maps. Because few  
292 species were categorized as aquatic (1.87 % of included taxa, i.e. 49 species), the variance  
293 in transition rate estimates was much greater than for the other habitats (Supp. Figure S2),  
294 so we excluded aquatic lineages from further analyses. We compared the transition rates  
295 between pairs of habitats using a Tukey honest significant differences test (Table 1).

296

### 297 *Sampling of Ethiopian Ptychadena*

298 Individuals of the *Ptychadena neumanni* species complex were collected in the  
299 highlands of Ethiopia between 2011 and 2019. Our study was approved by the relevant  
300 Institutional Animal Care and Use Committee at Queens College and New York University  
301 School of Medicine (IACUC; Animal Welfare Assurance Number A32721-01 and laboratory  
302 animal protocol 19-0003). Frogs were sampled according to permits DA31/305/05,  
303 DA5/442/13, DA31/454/07, DA31/192/2010, DA31/230/2010, DA31/7/2011 and  
304 DA31/02/11 provided by the Ethiopian Wildlife Conservation Authority. We photographed  
305 individuals in life and euthanized them by ventral application of 20% benzocaine gel. We  
306 extracted tissue samples and stored them in RNAlater or 95% ethanol. Adult individuals  
307 were fixed in 10% formalin for 24 to 48 hours, and then transferred to 70% ethanol. After  
308 preservation, we took additional photographs of all individuals. All specimens were

309 deposited at the Natural History Collection of the University of Addis Ababa, Ethiopia.  
310 Tissue samples are deposited at the Vertebrate Tissue Collection, New York University Abu  
311 Dhabi (NYUAD).

312

### 313 *Histological skin sections*

314 Dorsal and ventral skin sections were extracted from ten preserved adult  
315 specimens: two thin striped (SB81, SB82) and one unstriped (SB69) *Ptychadena robeensis*  
316 specimens, two thin striped (SB493, SB510) and one wide striped (SB494) *P. nana*, two  
317 wide striped (SB552, SB548) *P. erlangeri*, and two wide striped (SB584, SB593) *P.*  
318 *amharensis*. The skin samples were embedded in paraffin blocks and sections of 4 µm  
319 thickness were produced. The sections were stained with hematoxylin-eosin (HE) and  
320 chromatophores were examined using a Leica DMI 6000 B microscope.

321

### 322 *DNA and RNA extractions and sequencing*

323 Genomic DNA of 61 *Ptychadena robeensis* individuals was extracted from liver tissue  
324 using the DNeasy blood and tissue kit (Qiagen, Valencia, CA). RNA was extracted from the  
325 skin of 13 individuals using a RNeasy mini kit (Qiagen, Valencia, CA). For eight individuals,  
326 RNA was extracted within and outside the vertebral stripe separately, for three individuals  
327 lacking any dorsal pattern, a single sample of dorsal skin was used, and for two individuals,  
328 RNA from ventral skin was extracted. We quantified extracted DNA and RNA using a Qubit  
329 fluorometer (Life Technologies). Libraries were prepared using a NEB library prep kit and  
330 sequenced on Illumina NextSeq 550 flow cells at the Genome Core Facility of New York  
331 University Abu Dhabi. After quality filtering, reads were aligned to the *de novo* assembly

332 *Ptychadena robeensis* reference genome<sup>25</sup>. The average coverage of the genomic data was  
333 4.84X, except for four individuals which we sequenced at an average of 12.97X. Variants  
334 were called using the function *HaplotypeCaller* from *gatk v3.5*<sup>45</sup>. The low-coverage and  
335 higher-coverage samples were then combined and genotyped in two separate datasets  
336 using *CombineGVCF* and *GenotypeGVCFs* functions from *gatk*.

337  
338 *Genome-wide association study on P. robeensis*

339       After examination of the low-coverage genomic dataset (n=61 individuals; SNPs PCA  
340 and visual examination in IGV), we realized that five individuals were hybrids , likely  
341 resulting from the crossing of *P. robeensis* and *P. levenorum*, a closely related species with a  
342 partially overlapping distribution range<sup>24</sup>. After removing the hybrids, the dataset  
343 comprised 17,797,568 SNPs. We excluded four individuals, which presented no dorsal  
344 melanization and could not be categorized as thin or wide striped, and our final dataset  
345 contained 52 individuals (25 wide striped and 27 thin striped. Stripe phenotype (thin, wide  
346 or unstriped) and coloration (brown or green) were not correlated. Quality checks and the  
347 genome-wide association study (GWAS) were done using *PLINK 1.9*<sup>40,41</sup>. We checked for  
348 individual relatedness as well as major discrepancies between samples in data missingness  
349 and minor allele frequency. However, because of the low-coverage nature of our data, we  
350 did not apply any stringent quality filtering. We extracted and visualized the result of the  
351 GWAS using the R package *qqman*<sup>48</sup>.

352  
353



354 *Test for selection and alleles ages in Ptychadena robeensis*

355           We searched for signatures of selection in the regions linked to dorsal stripe pattern  
356 and determined the age of the alleles using *ARGweaver*. In short, *ARGweaver* reconstructs a  
357 set of Ancestral Recombination Graphs (ARGs) for every non-recombining interval in the  
358 genomic region of interest. The program then samples from the posterior distribution of  
359 ARGs given an evolutionary model. Regions under positive selection should display a  
360 reduced coalescence time whereas regions under ancient balancing selection should have  
361 older coalescence time compared to neutral regions.

362

363           We ran *ARGweaver* on the high-coverage *Ptychadena robeensis* dataset (12.97X  
364 average coverage) comprising four individuals. We used the mutation rate estimated for  
365 the species group<sup>34</sup>  $6.98e-10$ /bp/generation (with a 2-year generation time) and the  
366 average recombination rate estimated for *Xenopus tropicalis*<sup>49</sup>,  $9.73e-9$ /bp/generation as  
367 priors. The effective population size was estimated as a function of time in SMC++<sup>50</sup>  
368 elsewhere<sup>51</sup>, and we used a maximum coalescence time of 4 million generations, around  
369 twenty times the harmonic mean of the estimated effective population size over time.  
370 *ARGweaver* was run for 5,000 iterations and ARGs were sampled every 100 iteration.  
371 Convergence of the chain was monitored visually by plotting multiple ARG statistics  
372 (priors, likelihood, number of recombination events, total branch length, number of variant  
373 sites not explained by a single mutation) against iteration number. All statistics were  
374 stationary after the first 2,000 iterations, so we discarded these 2,000 first iterations as  
375 burn-in for further analyses.

376

377 We inspected the phased haplotypes and categorized them in *wide* or *thin*  
378 haplotypes, thereby considering haplotypes rather than individuals in the subsequent  
379 analyses. We extracted times to the most recent common ancestor (TMRCA) for the *wide*  
380 and *thin* haplotypes, as well as for the whole population and compared the three curves  
381 across our region of interest. Ancient balancing selection should show TMRCA older than  
382 neutral genomic regions and an equal TMRCA between the haplotypes and the overall  
383 population. Positive selection or recent balancing selection, on the other hand, should have  
384 and overall TMRCA similar to neutral regions but haplotype TMRCA more recent than the  
385 overall TMRCA.

386

### 387 *Phylogeny of haplotypes*

388 In order to compare the region of interest across the *Ptychadena neumanni* species  
389 complex, we reconstructed a haplotype phylogeny. The genomes of the 12 species (one  
390 individual per species, except for *P. robeensis* for which the genomes of five individuals  
391 were included) were phased using Beagle 5.1<sup>52</sup>. We then built a phylogeny of haplotypes in  
392 the region of interest (40kb region; 6,677 SNPs) using the R package *SNPRelate*<sup>53</sup> (Fig. 4b).

393

### 394 *Gene expression analysis*

395 Reads were aligned to the annotated reference genome using HISAT2<sup>54</sup> and  
396 StringTie2<sup>55</sup>. A transcriptome-wide gene count matrix was then created using the script  
397 *prepDE.py3* provided on the StringTie website. Subsequent analyses were conducted in the  
398 R environment<sup>56</sup>. We used the R package *edgeR*<sup>57</sup> to filter and normalized our data prior  
399 analysis. We filtered out genes which had a count inferior to 1 count-per-million (cpm) in at

400 least 16 samples (>50% of the 21 samples in total) and applied a “Trimmed Mean of M-  
401 values” (TMM) normalization of the data using the *R* package *DESeq2*<sup>58</sup>. We then identified  
402 differentially expressed (DE) genes between wide and thin striped individuals as well as  
403 between sections of dorsal skin within and outside the vertebral stripe using the *DESeq*  
404 function of the same package.

405

#### 406 *Annotation of the region of interest*

407 In order to determine the type of variant responsible for the vertebral stripe pattern  
408 in *Ptychadena robeensis*, we annotated the region of chromosome 11 containing significant  
409 SNPs in the GWAS. We visually examined the transcripts obtained from our RNAseq data  
410 against the annotation for protein coding sequences predicted by Augustus<sup>25,59</sup> in the  
411 region using IGV<sup>60</sup>. Significant SNPs outputted by the GWAS were all located outside  
412 protein-coding regions, in between three genes: two predicted genes 40 kb apart were  
413 identified as *ASIP* and a third, 38kb downstream, was identified as *AHCY* using MegaBlast<sup>61</sup>.

414

415 While a single *ASIP* gene is known in birds and mammals, two genes, *ASIP1* and  
416 *ASIP2* are present in teleost fish<sup>27,62</sup>. In *Xenopus tropicalis*, a single *ASIP* gene is predicted,  
417 but no focal study in amphibians has been conducted to date. In order to determine  
418 whether the two genes in *P. robeensis* correspond to *ASIP*, *ASIP1*, or *ASIP2*, we translated  
419 the genomic sequences and produced a protein alignment and maximum likelihood  
420 phylogeny with the *ASIP* gene family in vertebrates using *seaview*<sup>63</sup> (Supp. Fig. S3). Both  
421 genes grouped together and with other amphibians' *ASIP*. We thus named them *ASIPa* and  
422 *ASIPb* to avoid any confusion with *ASIP1* and *ASIP2* from teleost fish. *ASIPa* is composed of

423 six exons, two of which are copies of *ASIPb*'s only two exons. Additionally, we detected a  
424 non-coding RNA (ncRNA) downstream *ASIPb*. A protein alignment revealed that this ncRNA  
425 contains a region aligning with the third exon of *ASIP* in other vertebrates, which is absent  
426 from *ASIPa* and *ASIPb*.

427

#### 428 *Quantitative real-time PCR experiment*

429 Quantitative real time PCR (qPCR) was conducted on RNA extracted from dorsal  
430 skin within (n=2) and outside (n=4) the vertebral stripe, and ventral skin (n=1). Each  
431 reaction was triplicated to minimize the impact of experimental error. Two reference genes  
432 were selected using our RNAseq dataset with the following criteria: a minimum of 50 count  
433 per million in all samples, the lowest possible variance in expression level among samples  
434 and a minimum of two exons. Candidate reference genes were then checked for functional  
435 independence and compared to genes typically used for qPCR in *Xenopus laevis*. We  
436 retained *rpl27* and *abce1* as candidate reference genes.

437

438 Primers for *ASIPb*, *rpl27* and *abce1* were designed based on the *Ptychadena*  
439 *robeensis* reference genome and annotation using Primer3Plus<sup>64</sup>. Primers were designed to  
440 span an exon-intron junction to avoid amplification of genomic DNA during the qPCR. The  
441 experiment was run using a StepOnePlus real-time PCR system and a Power SYBR Green  
442 RNA-to-CT 1-step kit (Applied Biosystems) on a volume of 20 $\mu$ l. Results were analyzed  
443 using the R package *pcr*<sup>65</sup>. We compared the expression levels of *rpl27* and *abce1* across  
444 samples and retained *rpl27*. Relative expression levels of *ASIPb* between our samples were

445 calculated using *rpl27* as reference gene and dorsal skin outside the stripe as reference  
446 group as it should have the lowest level of *ASIPb*.

447

## 448 **Acknowledgments**

449 We would like to thank the Ethiopian Wildlife Conservation Authority and the  
450 Ethiopian Biodiversity Institute for providing us with collecting and export permits for the  
451 samples. Fieldwork in Ethiopia would not have been possible if not for the invaluable  
452 assistance of Megersa Kelbessa, Itbarek, and Samuel Woldeyes of Rock Hewn Tours. We  
453 also thank the important number of students and postdocs who collected *Ptychadena*  
454 specimens and samples over the years, and in particular Xenia Freilich, Jacobo Reyes-  
455 Velasco, Justin Wilcox, Sebastian Kirchhof and Marcin Falis. We are very thankful for the  
456 help from Marc Arnoux and Nizar Drou, from the Genome Core Facility and the  
457 Bioinformatics group at NYUAD. This research was carried out on the High-Performance  
458 Computing resources at New York University Abu Dhabi. We also thank David Howse and  
459 Sayel Daoud of The National Reference Laboratory and Rachid Rezgui from the Microscopy  
460 Core Facility at NYUAD for their help in producing and visualizing histological sections.

461

462 **Funding.** This project was funded by NYUAD Grant AD180 to SB. The NYUAD Sequencing  
463 Core is supported by NYUAD Research Institute grant G1205A to the NYUAD Center for  
464 Genomics and Systems Biology.

465

466 **Author contributions**

467 SG and SB designed the study. KDU and SG collected color pattern and habitat data.  
468 SG, YB, and SB collected *Ptychadena* spp. specimens and samples. SG extracted DNA and  
469 RNA from *Ptychadena* spp. samples and ran the and qPCR. SG produced and interpreted  
470 histological section photographs and conducted comparative, genomic and gene expression  
471 analyses. IH and YB provided help and advice on genomic and transcriptomic analyses. All  
472 authors read and contributed to the manuscript.

473

474 **Competing interests**

475 The authors declare no competing interest.

476

477 **References**

- 478 1. Bull, C. M. Black pattern polymorphism and tadpole growth rate in two Western Australian  
479 frogs. *Aust. J. Zool.* **25**, 243–248 (1977).
- 480 2. Otaki, J. M. Physiological side-effect model for diversification of non-functional or neutral  
481 traits : a possible evolutionary history of Vanessa butterflies (*Lepidoptera*, Nymphalidae).  
482 *Lepidoptera Sci.* **59**, 87–102 (2008).
- 483 3. Chen, I.-P., Stuart-Fox, D., Hugall, A. F. & Symonds, M. R. E. Sexual Selection and the  
484 Evolution of Complex Color Patterns in Dragon Lizards. *Evolution* **66**, 3605–3614 (2012).
- 485 4. Zhou, W. *et al.* Sexual selection on jumping spider color pattern: investigation with a new  
486 quantitative approach. *Behav. Ecol.* (2021) doi:10.1093/beheco/arab008.
- 487 5. Briolat, E. S. *et al.* Diversity in warning coloration: selective paradox or the norm? *Biol. Rev.*  
488 **94**, 388–414 (2019).

- 489 6. Osorio, D., Srinivasan, M. V. & Pettigrew, J. D. Camouflage by edge enhancement in animal  
490 coloration patterns and its implications for visual mechanisms. *Proc. R. Soc. Lond. B Biol. Sci.*  
491 **244**, 81–85 (1991).
- 492 7. Stevens, M. & Cuthill, I. C. Disruptive coloration, crypsis and edge detection in early visual  
493 processing. *Proc. R. Soc. B Biol. Sci.* **273**, 2141–2147 (2006).
- 494 8. Cuthill, I. C. & Székely, A. Coincident disruptive coloration. *Philos. Trans. R. Soc. B Biol. Sci.*  
495 **364**, 489–496 (2009).
- 496 9. Ruxton, G. D., Allen, W. L., Sherratt, T. N. & Speed, M. P. *Avoiding Attack: The Evolutionary*  
497 *Ecology of Crypsis, Aposematism, and Mimicry. Avoiding Attack* (Oxford University Press,  
498 2018).
- 499 10. Skelhorn, J., Rowland, H. M., Speed, M. P. & Ruxton, G. D. Masquerade: Camouflage  
500 Without Crypsis. *Science* **327**, 51–51 (2010).
- 501 11. Rowland, H. M., Cuthill, I. C., Harvey, I. F., Speed, M. P. & Ruxton, G. D. Can't tell the  
502 caterpillars from the trees: countershading enhances survival in a woodland. *Proc. R. Soc. B*  
503 *Biol. Sci.* **275**, 2539–2545 (2008).
- 504 12. Godfrey, D., Lythgoe, J. N. & Rumball, D. A. Zebra stripes and tiger stripes: the spatial  
505 frequency distribution of the pattern compared to that of the background is significant in  
506 display and crypsis. *Biol. J. Linn. Soc.* **32**, 427–433 (1987).
- 507 13. Woolbright, L. L. & Stewart, M. M. Spatial and Temporal Variation in Color Pattern  
508 Morphology in the Tropical Frog, *Eleutherodactylus coqui*. *Copeia* **2008**, 431–437 (2008).
- 509 14. Rojas, B. Behavioural, ecological, and evolutionary aspects of diversity in frog colour  
510 patterns. *Biol. Rev.* **92**, 1059–1080 (2017).

- 511 15. Hurtado-Gonzales, J. L. & Uy, J. A. C. Alternative mating strategies may favour the  
512 persistence of a genetically based colour polymorphism in a pentamorphic fish. *Anim.*  
513 *Behav.* **77**, 1187–1194 (2009).
- 514 16. Pérez i de Lanuza, G., Font, E. & Carazo, P. Color-assortative mating in a color-polymorphic  
515 lacertid lizard. *Behav. Ecol.* **24**, 273–279 (2013).
- 516 17. Hoffman, E. A. & Blouin, M. S. A review of colour and pattern polymorphisms in anurans.  
517 *Biol. J. Linn. Soc.* **70**, 633–665 (2000).
- 518 18. Stewart, M. M. Parallel Pattern Polymorphism in the Genus *Phrynobatrachus* (Amphibia:  
519 Ranidae). *Copeia* **1974**, 823–832 (1974).
- 520 19. McElroy, M. T. Teasing apart crypsis and aposematism – evidence that disruptive coloration  
521 reduces predation on a noxious toad. *Biol. J. Linn. Soc.* **117**, 285–294 (2016).
- 522 20. Anderson, N. K., Gutierrez, S. O. & Bernal, X. E. From forest to city: urbanization modulates  
523 relative abundance of anti-predator coloration. *J. Urban Ecol.* **5**, (2019).
- 524 21. O’Neill, E. M. & Beard, K. H. Genetic Basis of a Color Pattern Polymorphism in the Coqui  
525 Frog *Eleutherodactylus coqui*. *J. Hered.* **101**, 703–709 (2010).
- 526 22. Pyron, R. A. Biogeographic Analysis Reveals Ancient Continental Vicariance and Recent  
527 Oceanic Dispersal in Amphibians. *Syst. Biol.* **63**, 779–797 (2014).
- 528 23. Frost, D. R. Amphibian species of the world: an online reference. Version 6.0.  
529 <http://research.amnh.org/herpetology/amphibia/index.html> (2018).
- 530 24. Goutte, S., Reyes-Velasco, J., Freilich, X., Kassie, A. & Boissinot, S. Taxonomic revision of  
531 grass frogs (Ptychadenidae, *Ptychadena*) endemic to the Ethiopian highlands. *ZooKeys* **1016**,  
532 77–141 (2021).



- 533 25. Hariyani, I., Reyes-Velasco, J. & Boissinot, S. A chromosome-scale genome assembly for the  
534 Ethiopian Highland frog *Ptychadena robeensis*. (*in preparation*).
- 535 26. Sviderskaya, E. V., Hill, S. P., Balachandar, D., Barsh, G. S. & Bennett, D. C. Agouti signaling  
536 protein and other factors modulating differentiation and proliferation of immortal  
537 melanoblasts. *Dev. Dyn.* **221**, 373–379 (2001).
- 538 27. Cal, L., Suarez-Bregua, P., Cerdá-Reverter, J. M., Braasch, I. & Rotllant, J. Fish pigmentation  
539 and the melanocortin system. *Comp. Biochem. Physiol. A. Mol. Integr. Physiol.* **211**, 26–33  
540 (2017).
- 541 28. Liang, D. *et al.* Genomic Analysis Revealed a Convergent Evolution of LINE-1 in Coat Color: A  
542 Case Study in Water Buffaloes (*Bubalus bubalis*). *Mol. Biol. Evol.* **38**, 1122–1136 (2020).
- 543 29. Jones, M. R. *et al.* Adaptive introgression underlies polymorphic seasonal camouflage in  
544 snowshoe hares. *Science* (2018).
- 545 30. Nadkarni, N. A., Weale, M. E., von Schantz, M. & Thomas, M. G. Evolution of a Length  
546 Polymorphism in the Human PER3 Gene, a Component of the Circadian System. *J. Biol.*  
547 *Rhythms* **20**, 490–499 (2005).
- 548 31. Li, Y., Li, G., Wang, H., Du, J. & Yan, J. Analysis of a Gene Regulatory Cascade Mediating  
549 Circadian Rhythm in Zebrafish. *PLOS Comput. Biol.* **9**, e1002940 (2013).
- 550 32. Slominski, A. *et al.* The role of melanogenesis in regulation of melanoma behavior:  
551 Melanogenesis leads to stimulation of HIF-1 $\alpha$  expression and HIF-dependent attendant  
552 pathways. *Arch. Biochem. Biophys.* **563**, 79–93 (2014).
- 553 33. Ye, X. *et al.* ITRAQ Proteomic Analysis of Yellow and Black Skin in Jinbian Carp (*Cyprinus*  
554 *carpio*). *Life* **10**, (2020).

- 555 34. Freilich, X., Tollis, M. & Boissinot, S. Hiding in the highlands: Evolution of a frog species  
556 complex of the genus *Ptychadena* in the Ethiopian highlands. *Mol. Phylogenet. Evol.* **71**,  
557 157–169 (2014).
- 558 35. Girardot, M. *et al.* The insertion of a full-length *Bos taurus* LINE element is responsible for a  
559 transcriptional deregulation of the Normande Agouti gene. *Pigment Cell Res.* **19**, 346–355  
560 (2006).
- 561 36. Norris, B. J. & Whan, V. A. A gene duplication affecting expression of the ovine ASIP gene is  
562 responsible for white and black sheep. *Genome Res.* **18**, 1282–1293 (2008).
- 563 37. Almathen, F., Elbir, H., Bahbahani, H., Mwacharo, J. & Hanotte, O. Polymorphisms in MC1R  
564 and ASIP Genes are Associated with Coat Color Variation in the Arabian Camel. *J. Hered.*  
565 **109**, 700–706 (2018).
- 566 38. Galbraith, D. B. The agouti pigment pattern of the mouse: A quantitative and experimental  
567 study. *J. Exp. Zool.* **155**, 71–89 (1964).
- 568 39. Siracusa, L. D. The agouti gene: turned on to yellow. *Trends Genet.* **10**, 423–428 (1994).
- 569 40. Dolinoy, D. C. The agouti mouse model: an epigenetic biosensor for nutritional and  
570 environmental alterations on the fetal epigenome. *Nutr. Rev.* **66**, S7-11 (2008).
- 571 41. Ceinos, R. M., Guillot, R., Kelsh, R. N., Cerdá-Reverter, J. M. & Rotllant, J. Pigment patterns  
572 in adult fish result from superimposition of two largely independent pigmentation  
573 mechanisms. *Pigment Cell Melanoma Res.* **28**, 196–209 (2015).
- 574 42. Jones, M. R., Mills, L. S., Jensen, J. D. & Good, J. M. Convergent evolution of seasonal  
575 camouflage in response to reduced snow cover across the snowshoe hare range. *Evolution*  
576 **74**, 2033–2045 (2020).

- 577 43. Kratochwil, C. F. *et al.* Agouti-related peptide 2 facilitates convergent evolution of stripe  
578 patterns across cichlid fish radiations. *Science* **362**, 457–460 (2018).
- 579 44. Revell, L. J. phytools: an R package for phylogenetic comparative biology (and other things).  
580 *Methods Ecol. Evol.* **3**, 217–223 (2012).
- 581 45. McKenna, A. *et al.* The Genome Analysis Toolkit: A MapReduce framework for analyzing  
582 next-generation DNA sequencing data. *Genome Res.* **20**, 1297–1303 (2010).
- 583 46. Chang, C. C. *et al.* Second-generation PLINK: rising to the challenge of larger and richer  
584 datasets. *GigaScience* **4**, (2015).
- 585 47. Purcell, S. & Chang, C. *PLINK*. (2017).
- 586 48. Turner, S. D. qqman: an R package for visualizing GWAS results using Q-Q and manhattan  
587 plots. *bioRxiv* 005165 (2014) doi:10.1101/005165.
- 588 49. Wells, D. E. *et al.* A genetic map of *Xenopus tropicalis*. *Dev. Biol.* **354**, 1–8 (2011).
- 589 50. Terhorst, J., Kamm, J. A. & Song, Y. S. Robust and scalable inference of population history  
590 from hundreds of unphased whole genomes. *Nat. Genet.* **49**, 303–309 (2017).
- 591 51. Hariyani, I., Kirchhof, S., Bourgeois, Y., Reyes-Velasco, J. & Boissinot, S. Niche divergence  
592 and genomic adaptation shape an adaptive radiation of Ethiopian Highland anurans. *In*  
593 *prep.*
- 594 52. Browning, B. L., Tian, X., Zhou, Y. & Browning, S. R. Fast two-stage phasing of large-scale  
595 sequence data. *Am J Hum Genet* **108**, 1880–1890.
- 596 53. Zheng, X., Gogarten, S., Laurie, C. & Weir, B. A High-performance Computing Toolset for  
597 Relatedness and Principal Component Analysis of SNP Data. *Bioinformatics* **28**, 3326–3328  
598 (2012).

- 599 54. Kim, D., Paggi, J. M., Park, C., Bennett, C. & Salzberg, S. L. Graph-based genome alignment  
600 and genotyping with HISAT2 and HISAT-genotype. *Nat. Biotechnol.* **37**, 907–915 (2019).
- 601 55. Kovaka, S. *et al.* Transcriptome assembly from long-read RNA-seq alignments with  
602 StringTie2. *Genome Biol.* **20**, 278 (2019).
- 603 56. R Core Team. *R: A language and environment for statistical computing.* (R Foundation for  
604 Statistical Computing, Vienna, Austria, 2020).
- 605 57. Robinson, M. D., McCarthy, D. J. & Smyth, G. K. edgeR: a Bioconductor package for  
606 differential expression analysis of digital gene expression data. *Bioinformatics* **26**, 139–140  
607 (2010).
- 608 58. Love, M. I., Huber, W. & Anders, S. Moderated estimation of fold change and dispersion for  
609 RNA-seq data with DESeq2. *Genome Biol.* **15**, 550 (2014).
- 610 59. Keller, O., Kollmar, M., Stanke, M. & Waack, S. A novel hybrid gene prediction method  
611 employing protein multiple sequence alignments. *Bioinformatics* **27**, 757–763 (2011).
- 612 60. Robinson, J. T. *et al.* Integrative Genomics Viewer. *Nat. Biotechnol.* **29**, 24–26 (2011).
- 613 61. Johnson, M. *et al.* NCBI BLAST: a better web interface. *Nucleic Acids Res.* **36**, W5–9 (2008).
- 614 62. Cortés, R. *et al.* Evolution of the melanocortin system. *Gen. Comp. Endocrinol.* **209**, 3–10  
615 (2014).
- 616 63. Galtier, N., Gouy, M. & Gautier, C. SEAVIEW and PHYLO\_WIN: two graphic tools for  
617 sequence alignment and molecular phylogeny. *Comput. Appl. Biosci. CABIOS* **12**, 543–548  
618 (1996).
- 619 64. Untergasser, A. *et al.* Primer3Plus, an enhanced web interface to Primer3. *Nucleic Acids Res.*  
620 **35**, W71–W74 (2007).

- 621 65. Ahmed, M. & Kim, D. R. pcr: an R package for quality assessment, analysis and testing of  
622 qPCR data. *PeerJ* **6**, e4473 (2018).
- 623 66. Edgar, R. C. MUSCLE: multiple sequence alignment with high accuracy and high throughput.  
624 *Nucleic Acids Res.* **32**, 1792–1797 (2004).
- 625  
626

627 **Figure titles and legends**

628 **Figure 1. The evolution of the vertebral stripe in anurans. A** Examples of the vertebral  
629 stripe in distantly related species: from left to right, *Brachycephalus hermogenesi* (family:  
630 Brachycephalidae), *Fejervarya limnocharis* (family: Dicroglossidae), *Microhyla ornata*  
631 (family: Microhylidae), *Pelophylax nigromaculatus* (family: Ranidae), **B** vertebral stripe  
632 morphs (unstriped = grey, striped = blue, polymorphic = red; monomorphic striped taxa  
633 are further indicated by blue bars for readability) mapped on the phylogeny of Anura  
634 (n=2,785 species; 1,000 stochastic maps), **C** estimated number of transitions between  
635 striped and unstriped morphs in the evolution of anurans based on 1,000 stochastic maps,  
636 **D** habitat use mapped on the phylogeny of Anura (n= 2,620 species; 100 stochastic maps),  
637 **E** transition rates between striped and unstriped phenotypes for each habitat, estimated  
638 for 100 stochastic maps. Habitat categories: A = arboreal, Aq = aquatic, AT = arboreal-  
639 terrestrial, T = terrestrial, TAq = terrestrial-aquatic.

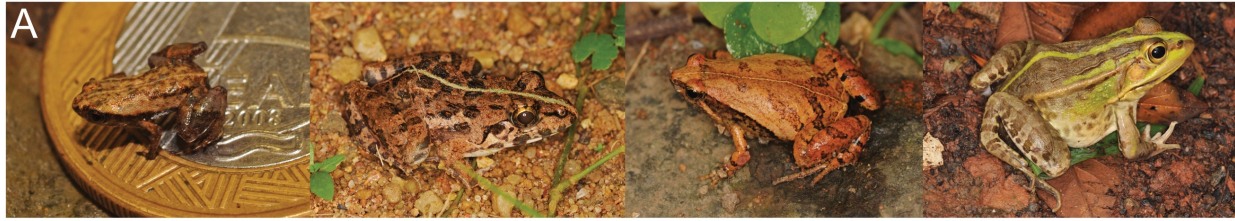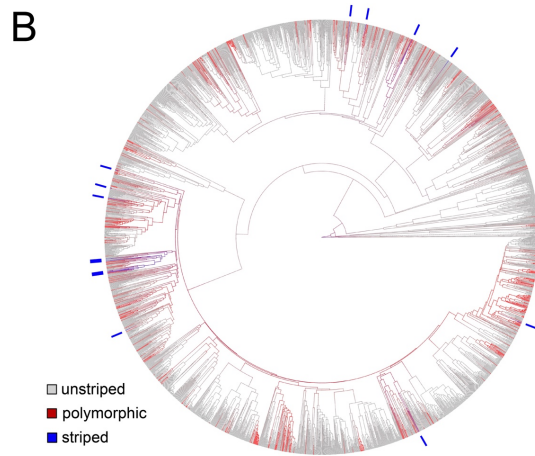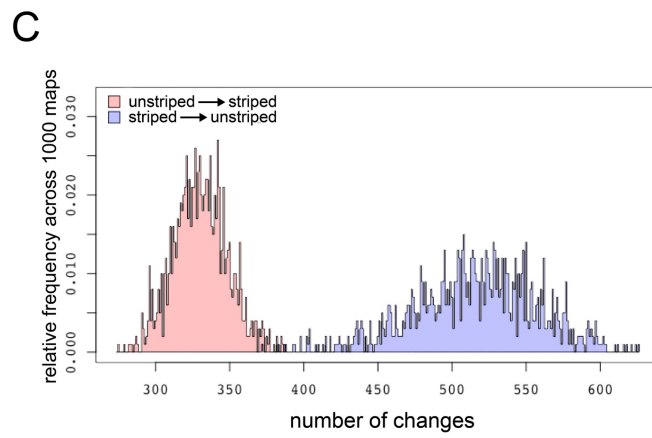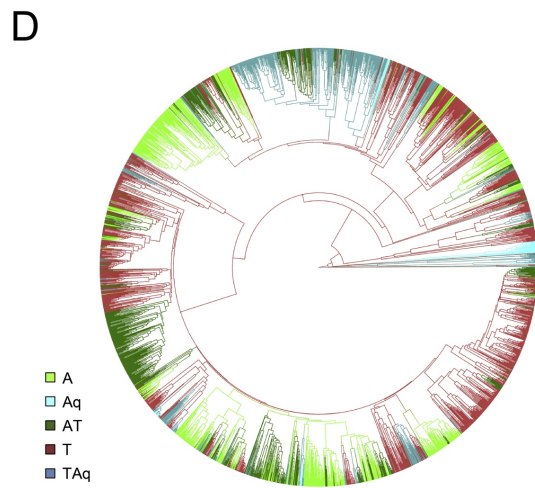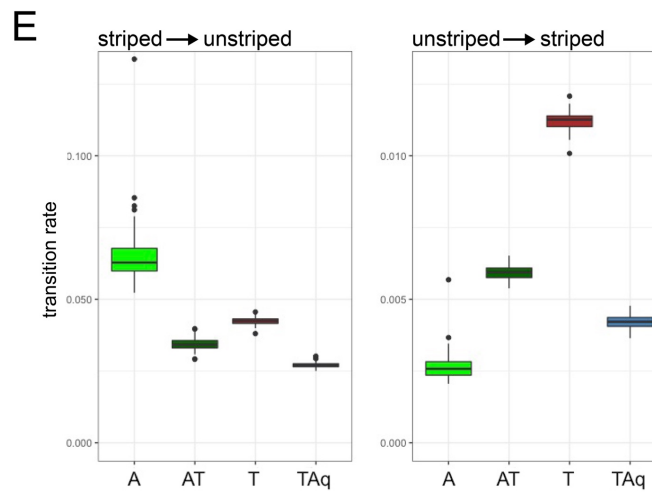

640  
641  
642

643 **Figure 2. The vertebral stripe in Ethiopian *Ptychadena*.** **A** Polymorphism of the  
644 vertebral stripe (wide or thin striped, or unstriped) in the *Ptychadena neumanni* species  
645 complex (phylogeny based on 500,000 genome-wide distributed SNPs, reproduced from<sup>51</sup>).  
646 Presence of the morph is indicated in blue, absence in white. **B** Adult *Ptychadena robeensis*  
647 presenting the three possible vertebral stripe morphs. From left to right: wide striped, thin  
648 striped, unstriped. **C** Histological sections of the dorsal skin within (top) and outside  
649 (bottom) the vertebral stripe in a female *Ptychadena erlangeri* (SB548; live photograph on  
650 the left). Scale bar = 200µm. Within the stripe (top), the few melanophores (blue arrows)  
651 are in a contracted state and do not entirely cover the xanthophores (green arrows), in  
652 contrast with the skin outside the stripe (bottom). Outside the the stripe, numerous  
653 melanosomes (red arrows) are also present in the epidermal layer, creating a very dark  
654 coloration.

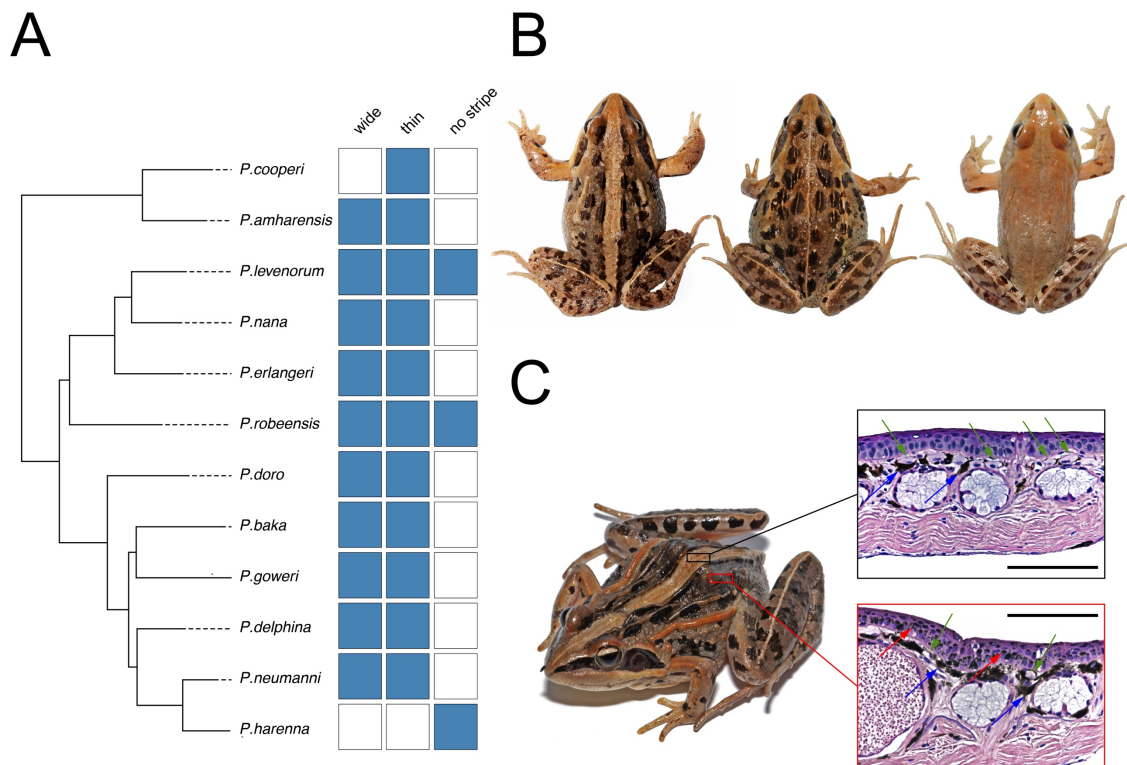

655



656 **Figure 3. Genes associated with the stripe phenotype in *Ptychadena robeensis*. A**  
657 Genome-wide association study (GWAS) reveals a single locus governing the vertebral  
658 stripe phenotype on chromosome 11 of *Ptychadena robeensis* (top panel). Significant SNPs  
659 (indicated in blue in the bottom panel) are located in between and downstream *ASIP* exons  
660 (indicated in light green below) and a non-coding RNA (pink). **B** and **C** Differential gene  
661 expression analysis in the skin of adult *Ptychadena robeensis*. 32 genes are differentially  
662 expressed between vertebral stripe phenotypes (**B**) and six within versus outside the  
663 vertebral stripe in the same individuals (**C**).

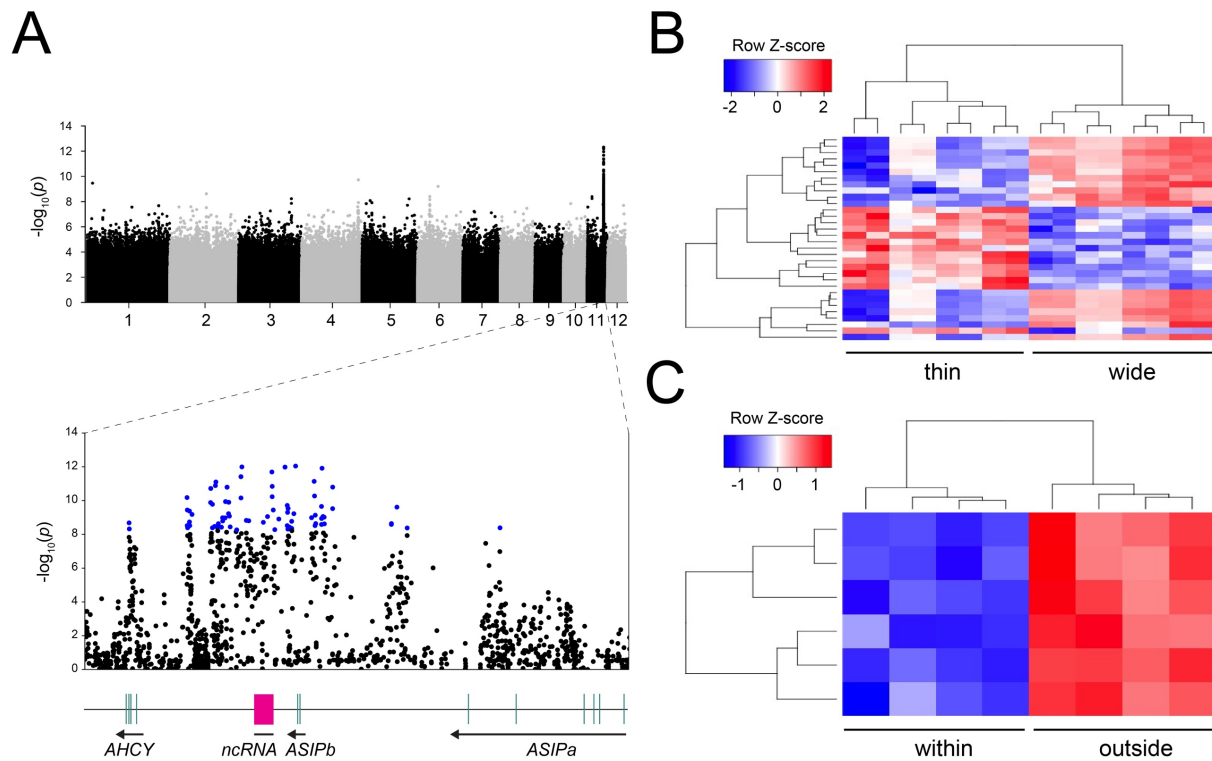

664

665 **Figure 4. Recent evolution of the *thin* and *wide* alleles. A** Leaf trace plot and TMRCA  
666 across the region of interest computed using ancestral recombination graphs analysis. Red  
667 and green solid lines indicate *wide* and *thin* haplotypes, respectively. Black solid lines  
668 indicate the overall population. The positions of *ASIPa*, *ASIPb*, *AHCY* and the ncRNA are  
669 indicated below and the region containing significant SNPs in the GWAS analysis is  
670 indicated by a horizontal blue bar. **B** Dendrograms based on dissimilarity of sequences in  
671 the region of interest (40kb region; 6,677 SNPs) in the *Ptychadena neumanni* species  
672 complex (8.29X average coverage). Haplotypes are denoted by A or B after the species or  
673 sample name. For *P. robeensis*, leaves are color-coded by haplotypes (green for *thin* and red  
674 for *wide*). Within *P. robeensis*, haplotypes are grouped by color pattern, while across the  
675 *Ptychadena neumanni* complex, they are grouped according to species relatedness and form  
676 the three clades previously described<sup>24</sup> (Fig. 2a).  
677

678

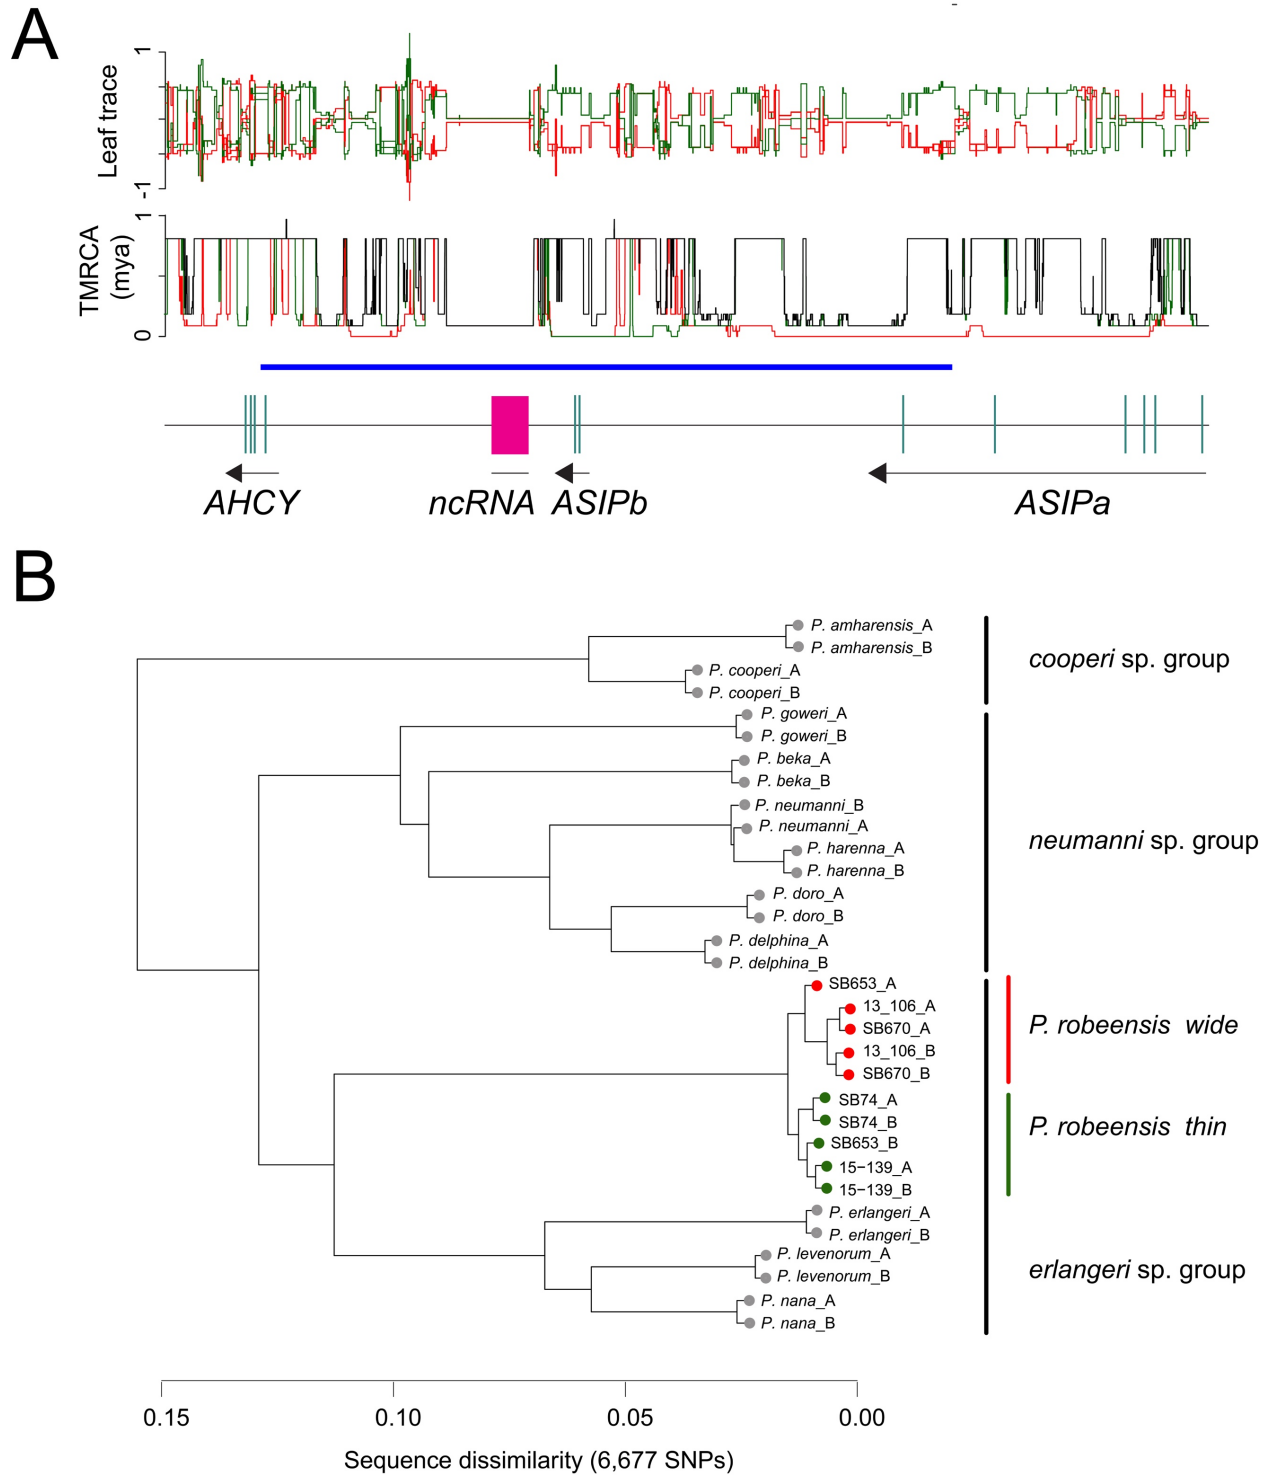

679

680

681

682 **Tables**

683

684 **Table 1. Tukey honest significant differences test of morph transition rates between**

685 **habitat pairs.** Values were multiplied by  $10^3$  for readability. Average ( $\Delta$ ), lower and upper

686 values of the difference between rates based on 100 stochastic maps are given. Habitat

687 categories: A = arboreal, Aq = aquatic, AT = arboreal-terrestrial, T = terrestrial, TAq =

688 terrestrial-aquatic.

|          | striped → unstriped |        |        |              | unstriped → striped |       |       |              |
|----------|---------------------|--------|--------|--------------|---------------------|-------|-------|--------------|
|          | $\Delta$            | lower  | upper  | adj. p-value | $\Delta$            | lower | upper | adj. p-value |
| AT - A   | -30.92              | -32.76 | -29.09 | < 0.001      | 3.30                | 3.19  | 3.42  | < 0.001      |
| T - A    | -22.84              | -24.68 | -21.00 | < 0.001      | 8.59                | 8.48  | 8.71  | < 0.001      |
| Taq - A  | -38.19              | -40.03 | -36.35 | < 0.001      | 1.58                | 1.46  | 1.69  | < 0.001      |
| T - AT   | 8.08                | 6.24   | 9.92   | < 0.001      | 5.29                | 5.17  | 5.41  | < 0.001      |
| TAq - AT | -7.27               | -9.11  | -5.43  | < 0.001      | -1.73               | -1.84 | -1.61 | < 0.001      |
| TAq - T  | -15.35              | -17.19 | -13.51 | < 0.001      | -7.02               | -7.13 | -6.90 | < 0.001      |

689

690

691

692

693

694 **Supplemental information**

695

696 **Table S1. Phenotype and habitat data and references.**

697

698 **Figure S1. Gain and loss rates of the anuran vertebral stripe are habitat-dependent. A**

699 Likelihood of the habitat-dependent and independent models estimated for 100 stochastic

700 maps. **B** P-values of the 100 likelihood ratio tests between dependent and independent. For

701 all 100 stochastic maps, the model with transition rates dependent of the habitat is favored.

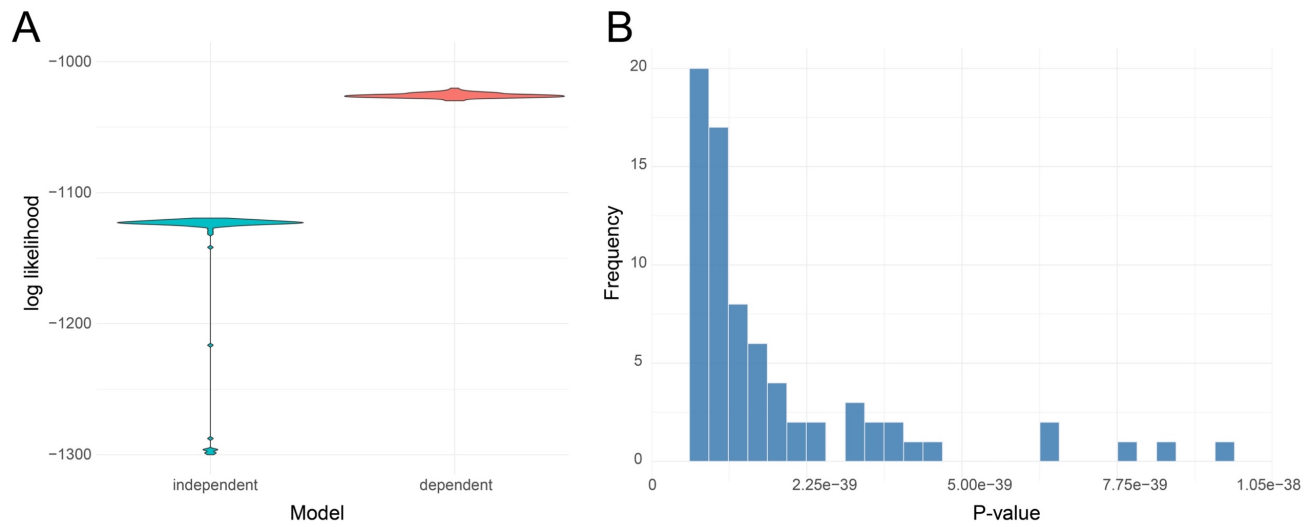

702

703

704

705

706 **Figure S2. Transition rates between striped and unstriped phenotypes for aquatic**  
707 **lineages estimated for 100 stochastic maps.** The low number of species in the aquatic  
708 category (1.87 % of included taxa, i.e. 49 species) results in important variation in rates  
709 among the stochastic maps.  
710

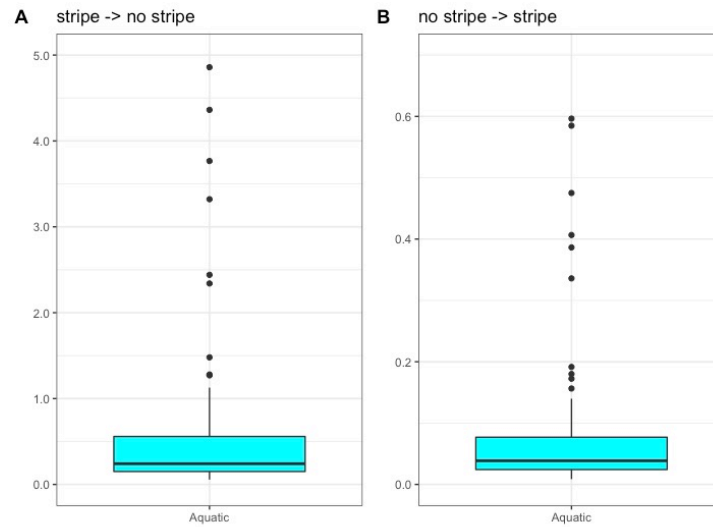

711

712

713

714 **Figure S3. Position of *ASIPa* and *ASIPb* in the evolution of *ASIP*.** Maximum likelihood  
 715 tree based on a protein alignment using MUSCLE<sup>66</sup>. *ASIPa* and *ASIPb* are grouped with *ASIP*  
 716 of *Xenopus tropicalis*, excluding the possibility for the two genes to correspond to fish's  
 717 *ASIP1* and *ASIP2*. Examination of the protein alignment showed that *ASIPa* and *ASIPb* share  
 718 two exons, resulting from a gene duplication event.

719

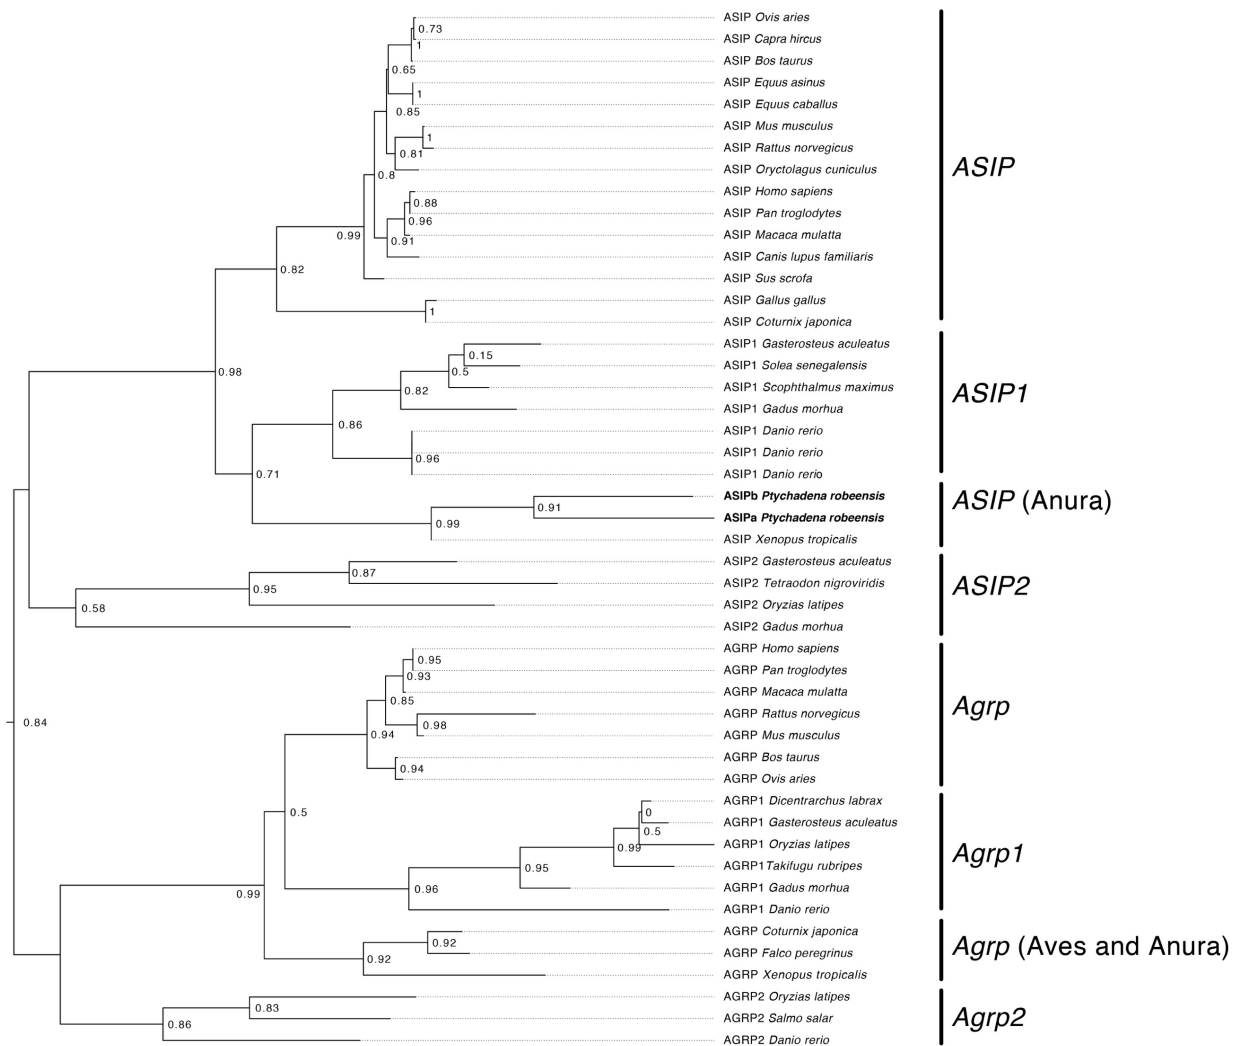

721 **Figure S4. Expression levels of ASIP in the skin of *Ptychadena robeensis*.** Normalized  
722 expression levels of *ASIPa*, *ASIPb* and the ncRNA from RNAseq data is given in log count per  
723 million. **A** ventral skin (n=2) shows a greater number of all three transcripts than dorsal  
724 skin (n=19), **B** skin within (n=4) and outside (n=4) the vertebral stripe do not show  
725 significant differences in expression level of *ASIPa*, *ASIPb* or the ncRNA.

726

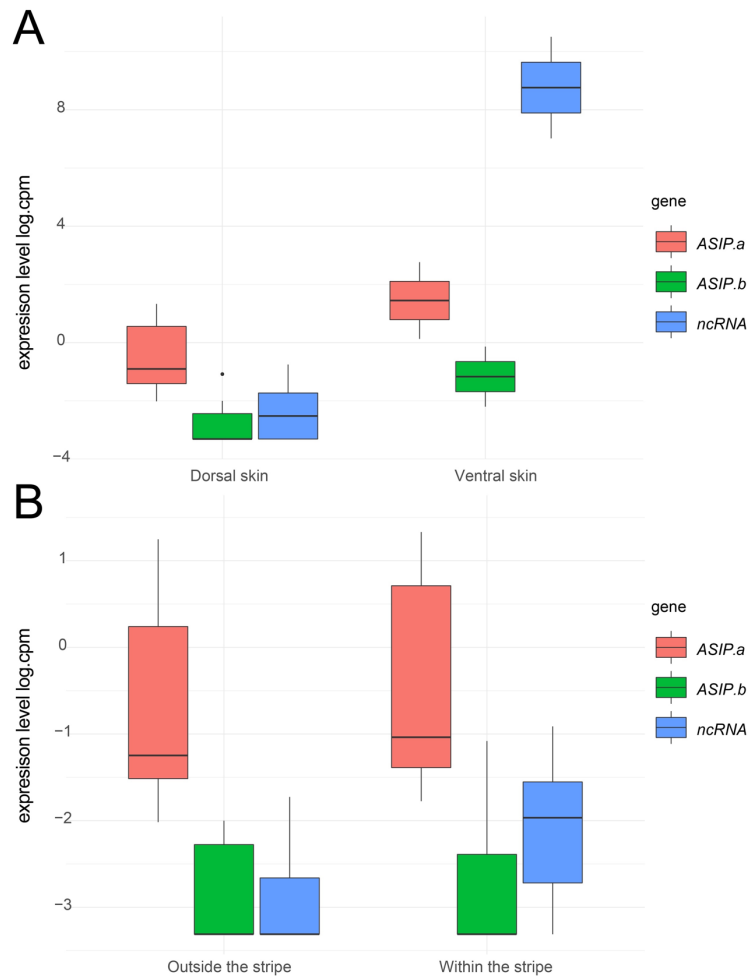

727  
728  
729  
730



731 **Figure S5. Quantitative real-time PCR of *ASIPb* in *Ptychadena robeensis*.** Relative  
732 expression levels of *ASIPb* in ventral skin (n=1) and dorsal skin within (n=2) and outside  
733 (n=4) the vertebral stripe measured by qPCR. Each reaction was triplicated and average CT  
734 value for each individual was used. *ASIPb* expression level in ventral skin is 80 times  
735 greater than in dorsal skin, while no significant differential expression is detected within  
736 versus outside the vertebral stripe.

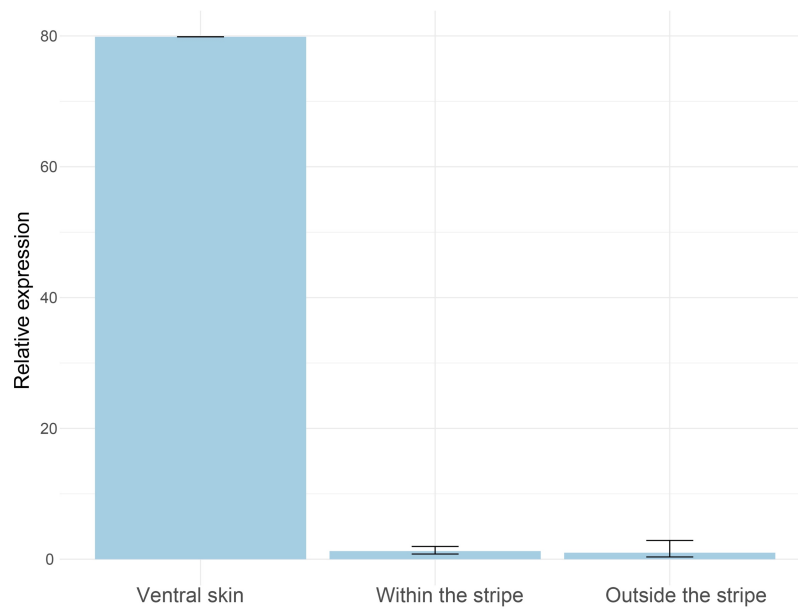

737

738

739

740
